# Supplementary material
Source: publisher figshare collection journal article supplement (https://tandf.figshare.com/articles/dataset/_/5144299)
Supplement: Supplementary file 2 [file 2]

Archive with 2 entries (2 files):
- jasaRevisionCode.tar.gz
- tech_report_supplement_1_1.pdf
